# Supplementary material for: A climatology of tropical wind shear produced by clustering wind profiles from the Met Office Unified Model (GA7.0)
Source: Copernicus journal article supplement (doi:10.5194/gmd-14-4035-2021), 2021-06-29
Supplement: Supplementary file 1 [file gmd-14-4035-2021-supplement.pdf]

Supplement of Geosci. Model Dev., 14, 4035–4049, 2021  
<https://doi.org/10.5194/gmd-14-4035-2021-supplement>  
© Author(s) 2021. CC BY 4.0 License.

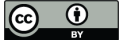

*Supplement of*

## **A climatology of tropical wind shear produced by clustering wind profiles from the Met Office Unified Model (GA7.0)**

**Mark R. Muetzelfeldt et al.**

*Correspondence to:* Mark R. Muetzelfeldt ([mark.muetzelfeldt@reading.ac.uk](mailto:mark.muetzelfeldt@reading.ac.uk))

The copyright of individual parts of the supplement might differ from the article licence.

## 1 Introduction

The results here are some things which are alluded to in the main manuscript, but which would be far too much detail for there. All analyses were run with COSAR [https://github.com/markmuetz/cosar\\_analysis](https://github.com/markmuetz/cosar_analysis), and omnium <https://github.com/markmuetz/omnium>. All figures should be compared against Fig. S1.

### List of Figures

|     |                                                                    |    |
|-----|--------------------------------------------------------------------|----|
| S1  | Production run: Favour lower troposphere on, seed 391137 . . . . . | 2  |
| S2  | DJF . . . . .                                                      | 3  |
| S3  | MAM . . . . .                                                      | 4  |
| S4  | JJA . . . . .                                                      | 5  |
| S5  | SON . . . . .                                                      | 6  |
| S6  | Favour lower troposphere off . . . . .                             | 8  |
| S7  | Seed 106586 . . . . .                                              | 10 |
| S8  | Seed 12042 . . . . .                                               | 11 |
| S9  | Seed 707637 . . . . .                                              | 12 |
| S10 | Seed 725154 . . . . .                                              | 13 |
| S11 | Low CAPE . . . . .                                                 | 16 |
| S12 | High CAPE . . . . .                                                | 17 |
| S13 | Low shear . . . . .                                                | 18 |
| S14 | High shear . . . . .                                               | 19 |
| S15 | Low favour factor . . . . .                                        | 20 |
| S16 | High favour factor . . . . .                                       | 21 |
| S17 | K-means scores . . . . .                                           | 22 |

### List of Tables

|   |                                                                                           |    |
|---|-------------------------------------------------------------------------------------------|----|
| 1 | RWPs, showing the match up between production and the different seeds . . . . .           | 9  |
| 2 | RWPs, showing the match up between production and the various sensitivity tests . . . . . | 14 |

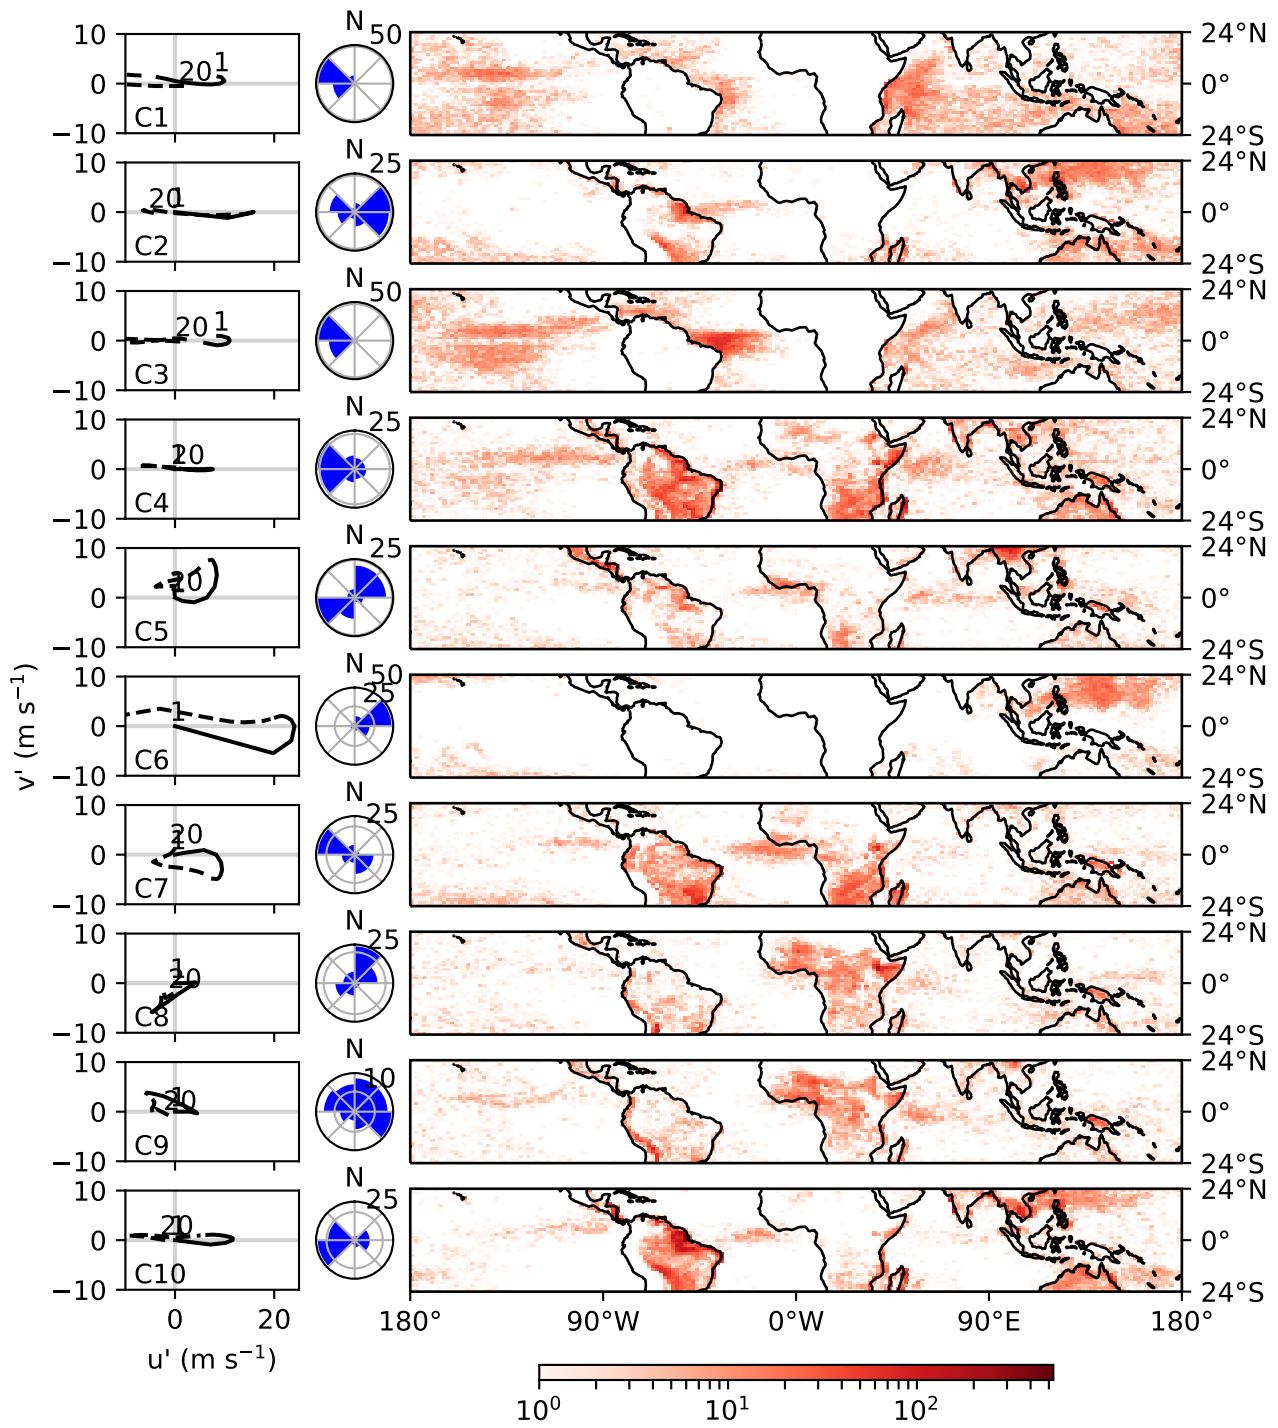

Figure S1. Production run: Favour lower troposphere on, seed 391137

## 2 Seasonal geographical locations

These are figures showing the geographical heatmaps for each of the seasons DJF, MAM, JJA, SON.

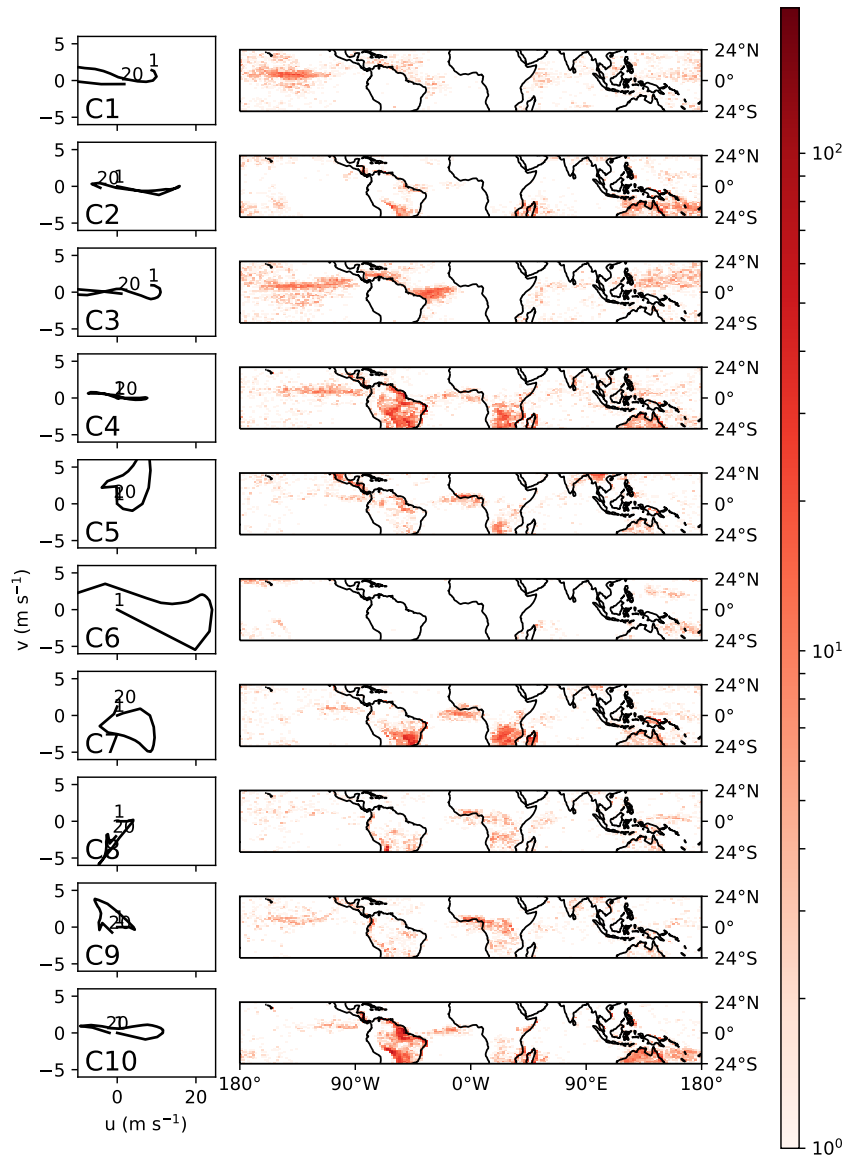

Figure S2. DJF



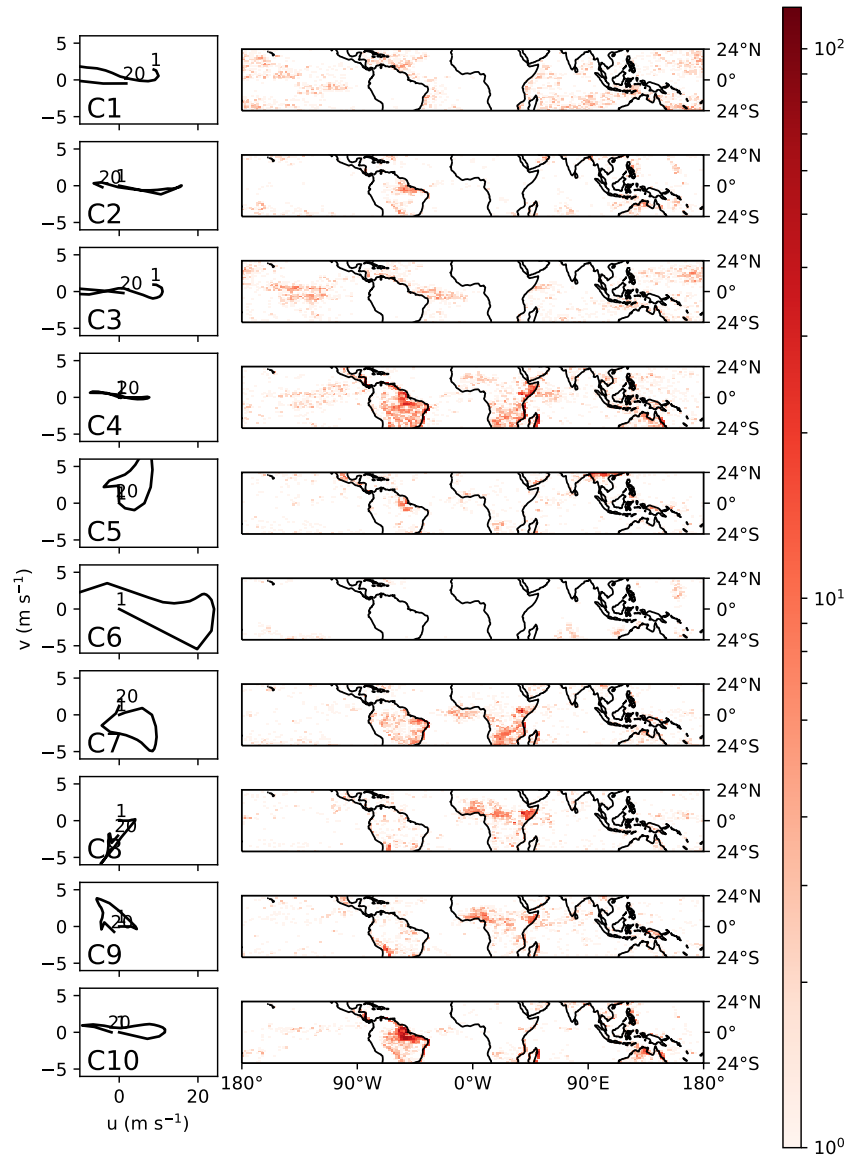

Figure S3. MAM

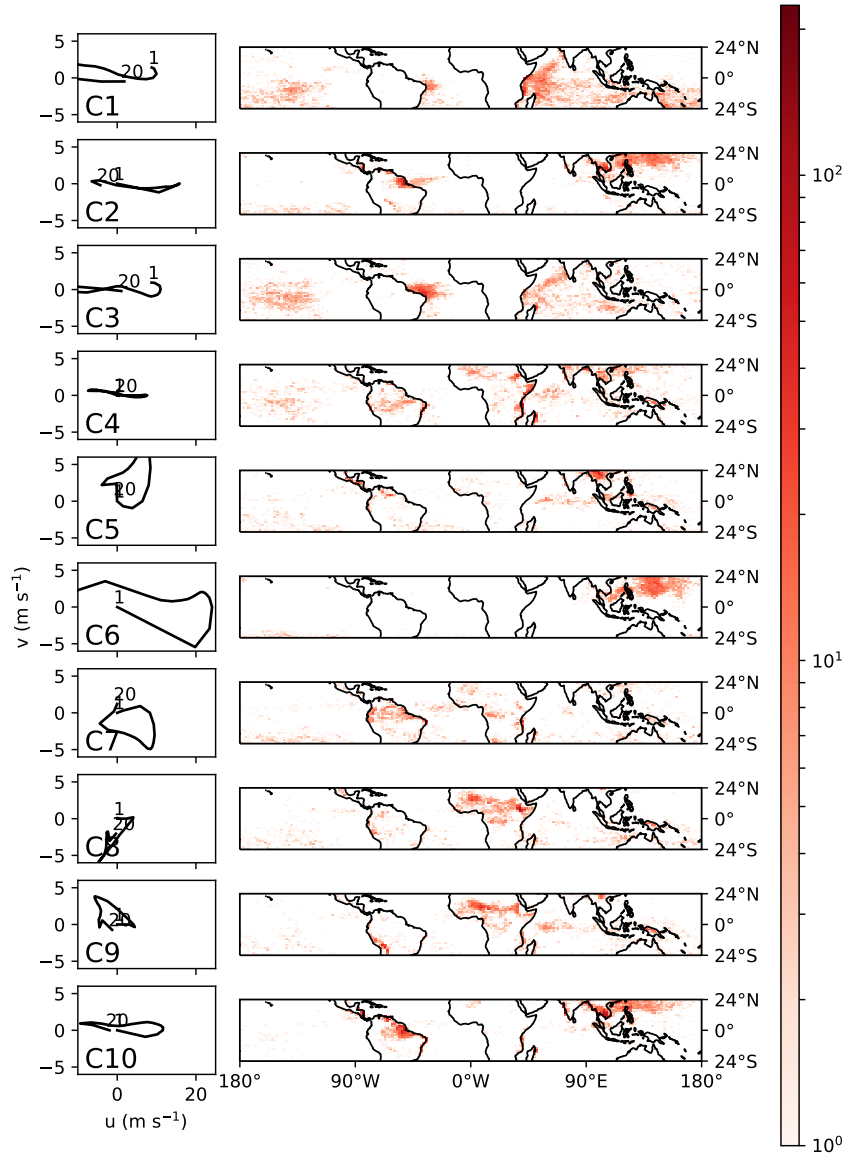

Figure S4. JJA

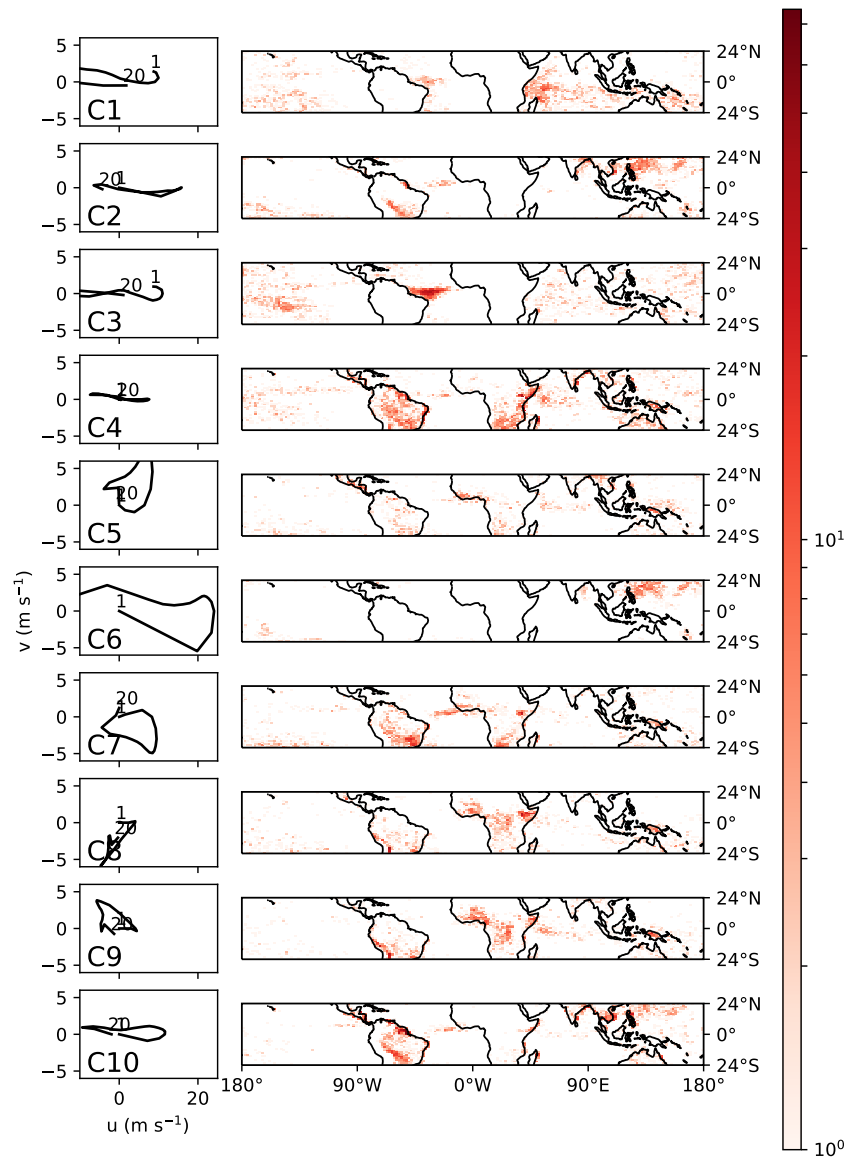

Figure S5. SON

### 3 Sensitivity to running with favour lower troposphere on/off

This section shows some justification for running with favour lower troposphere on. The original reason for running with this setting was to try to minimize the effect of the higher-latitude upper level winds in the clustering procedure. However, I wondered if this was still necessary after restricting my definition of the tropics to 23N - 23S (from 30N - 30S). I believe that it is after running this sensitivity test.

The means by which the lower troposphere is favoured is described in detail in the main document; briefly, it is achieved by weighting the contribution from above 500 hPa less than the contribution from below. The justification for doing this is that the lower-level winds are more important for the organization of convection.

Figure S6 below shows why favouring the lower troposphere is done. In Fig. S1, which is run with the production settings, the RWPs are well defined and are not dominated by higher-level winds. The opposite is true in Fig. S6. In particular, in C9 and to a lesser extent C5 there is a strong signal from the high-level winds. Thus it makes sense to carry on using the favour lower troposphere setting. Also, there is not a one-to-one correspondence between these RWPs and those with the production settings.

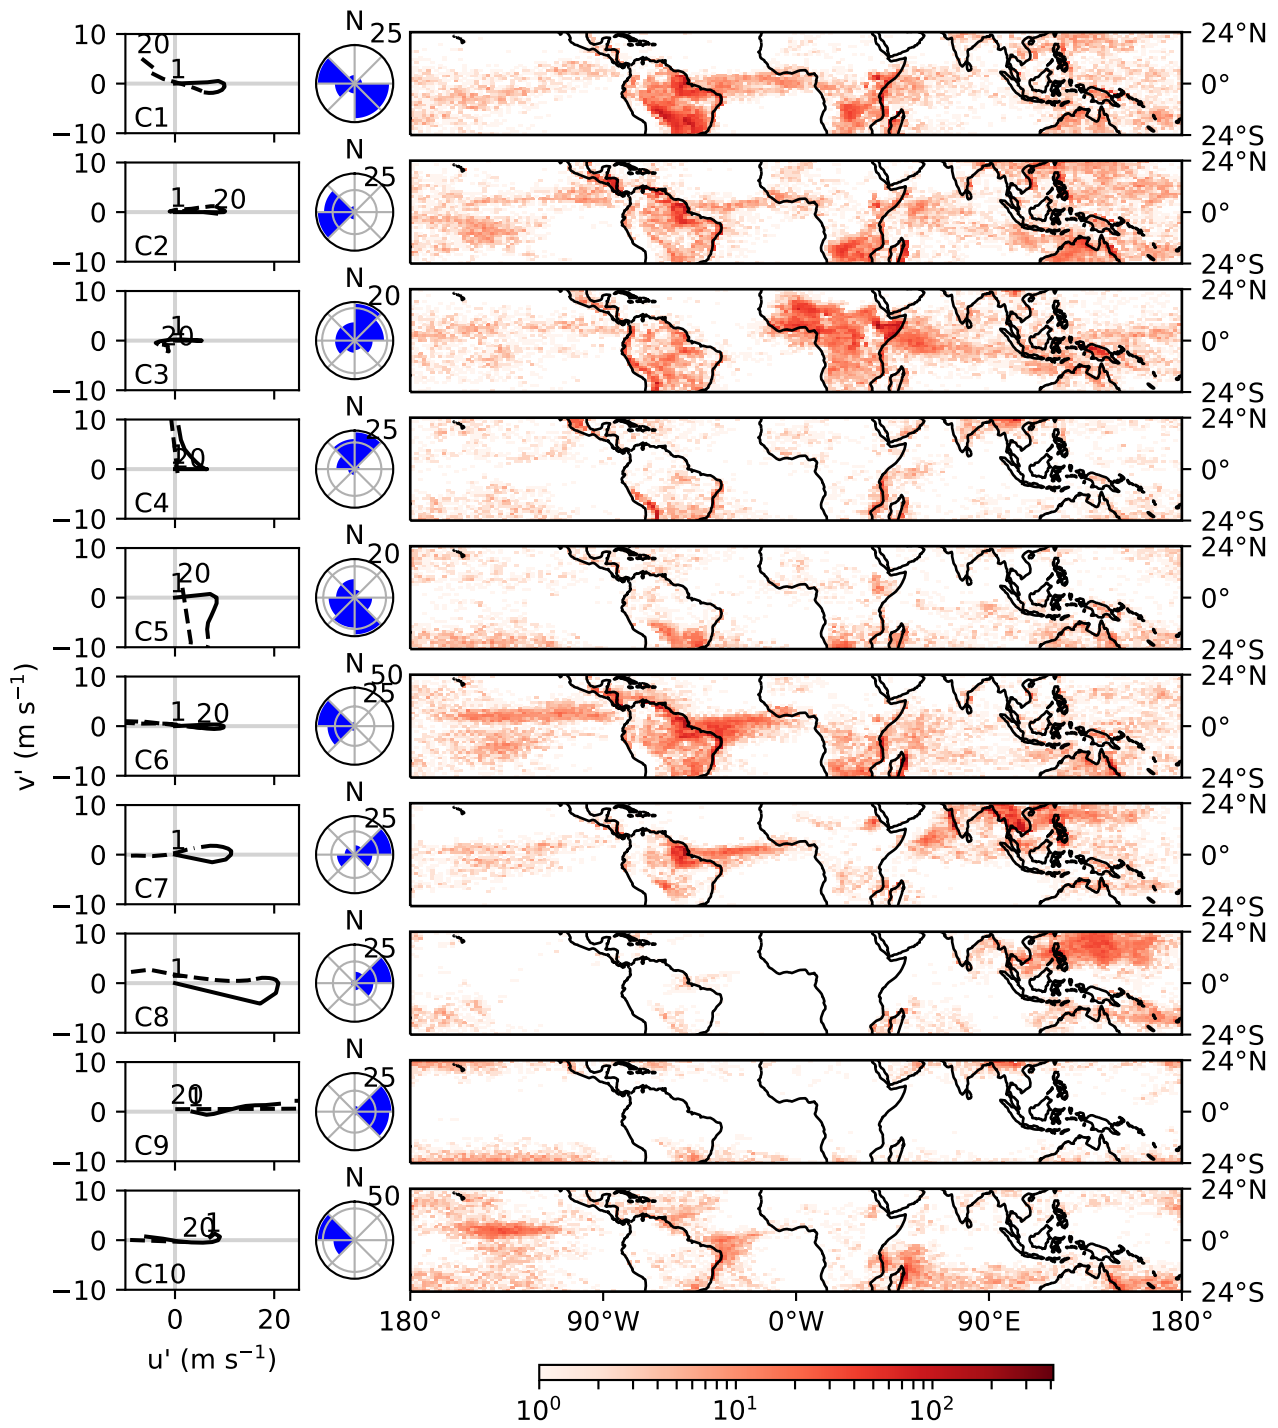

Figure S6. Favour lower troposphere off

#### 4 Random seeds

Using five different random seeds leads to the same set of RWPs, with only slight differences. One-to-one correspondence in all cases.

| 391137 (prod) | 106586 | 12042 | 707637 | 725154 |
|---------------|--------|-------|--------|--------|
| C1            | 8      | 7     | 7      | 7      |
| C2            | 4      | 4     | 3      | 1      |
| C3            | 9      | 3     | 2      | 8      |
| C4            | 3      | 6     | 4      | 9      |
| C5            | 2      | 10    | 6      | 5      |
| C6            | 7      | 8     | 10     | 4      |
| C7            | 10     | 1     | 5      | 2      |
| C8            | 6      | 2     | 9      | 6      |
| C9            | 1      | 9     | 1      | 10     |
| C10           | 5      | 5     | 8      | 3      |

**Table 1.** RWPs, showing the match up between production and the different seeds

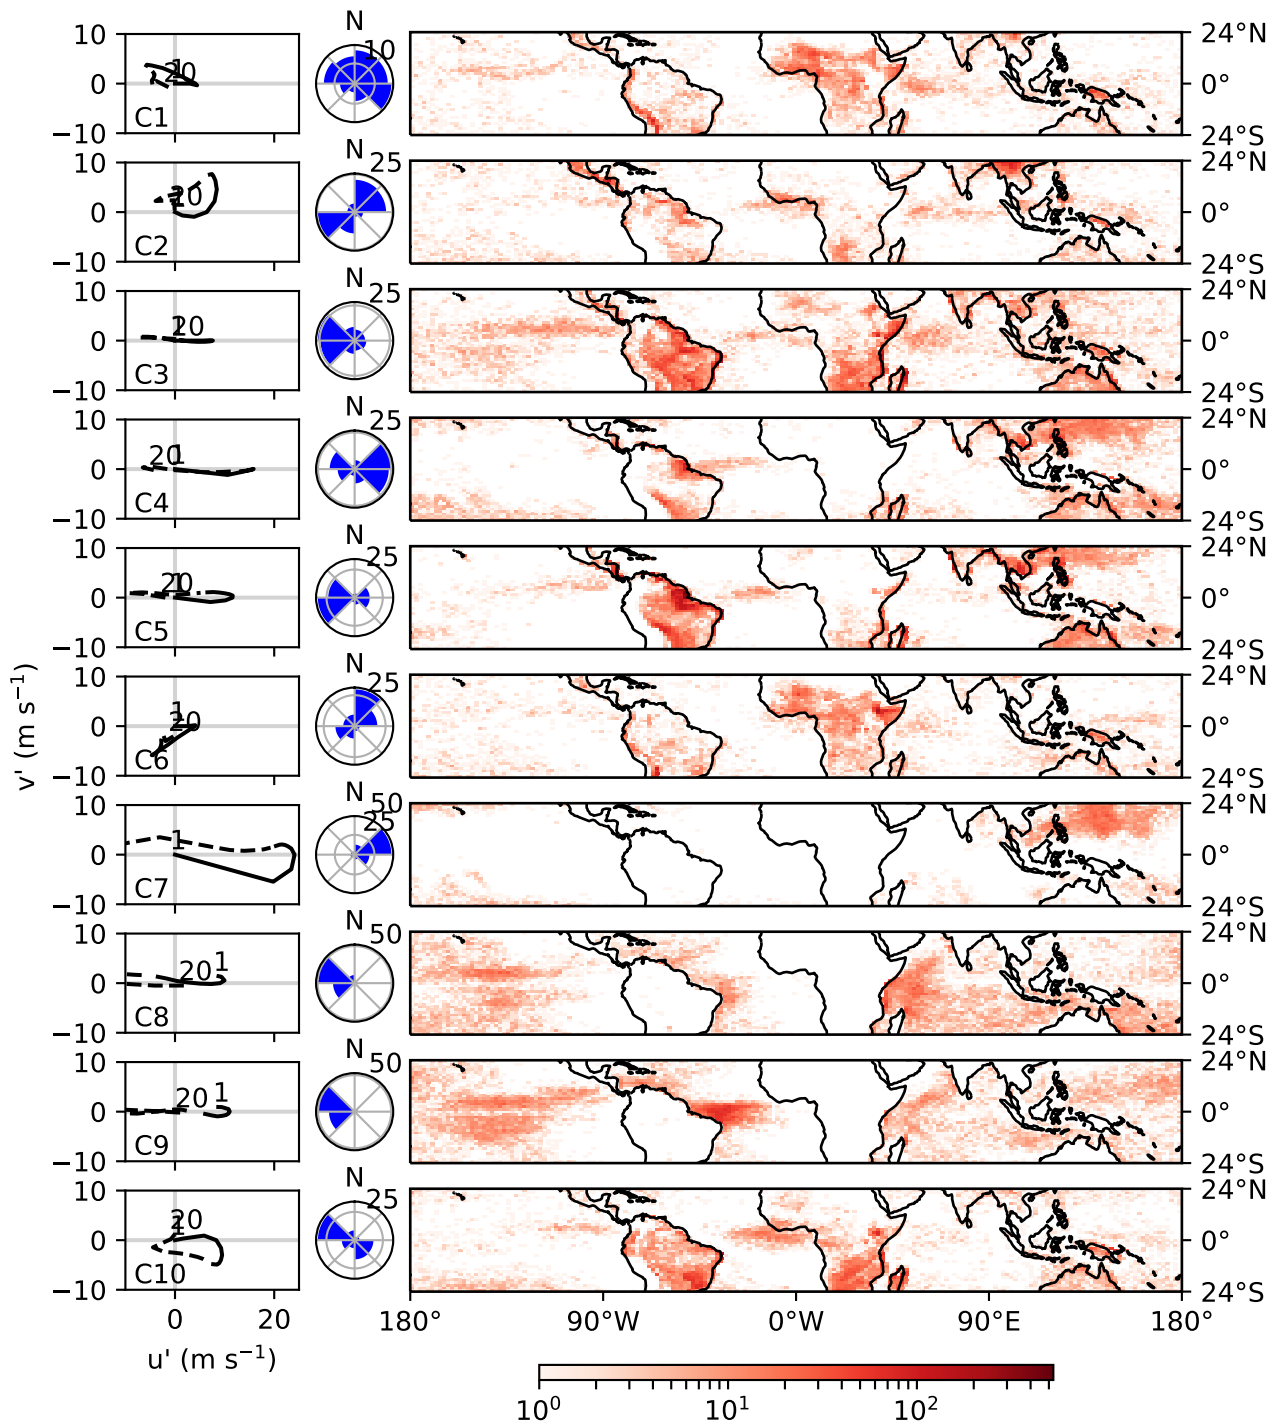

Figure S7. Seed 106586

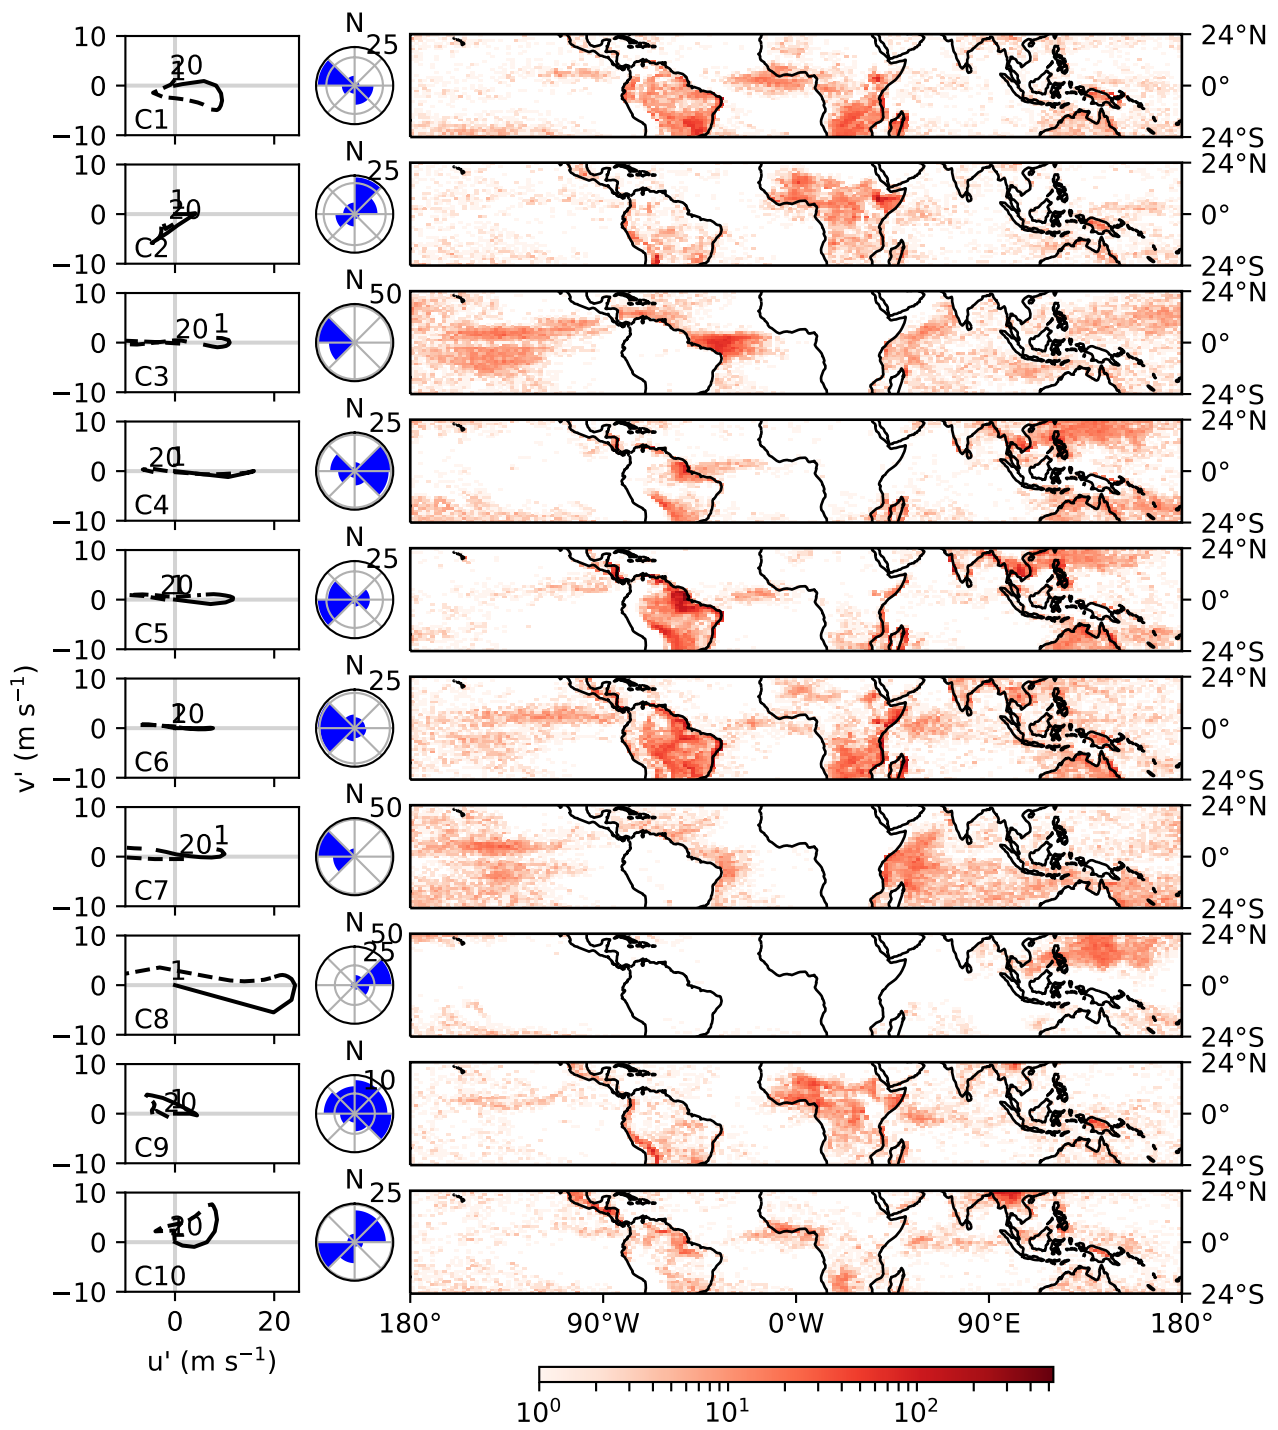

Figure S8. Seed 12042



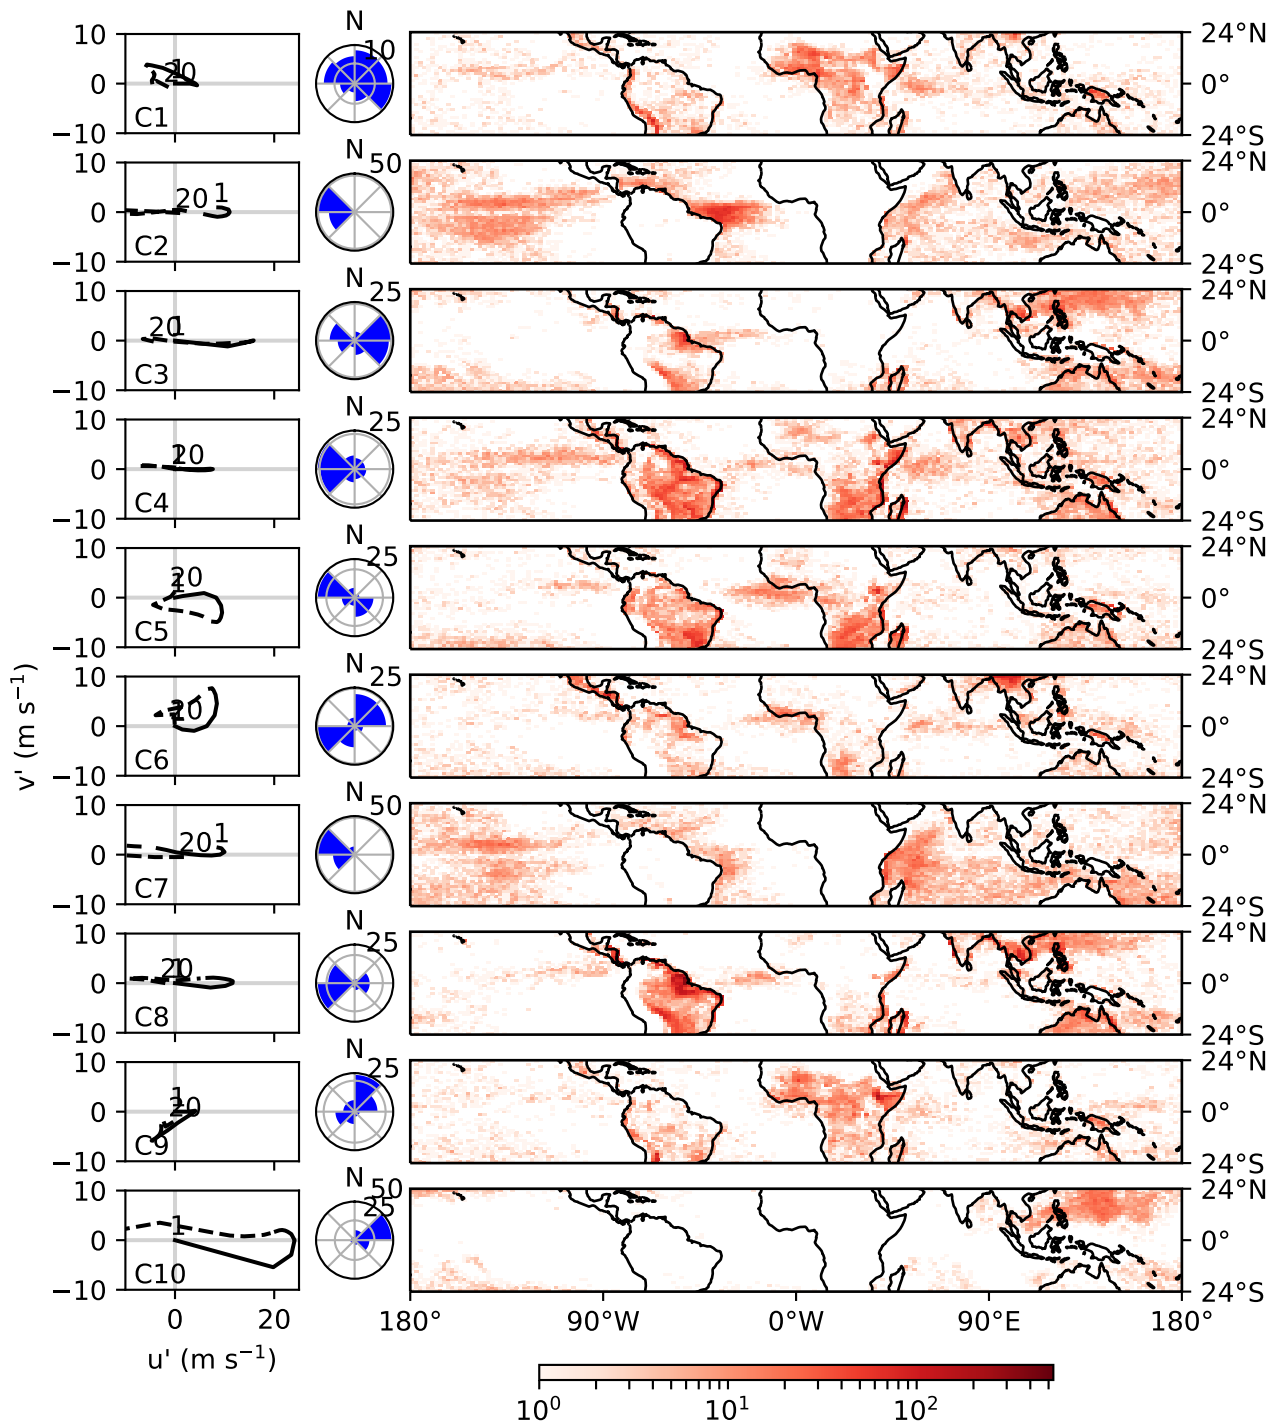

Figure S9. Seed 707637

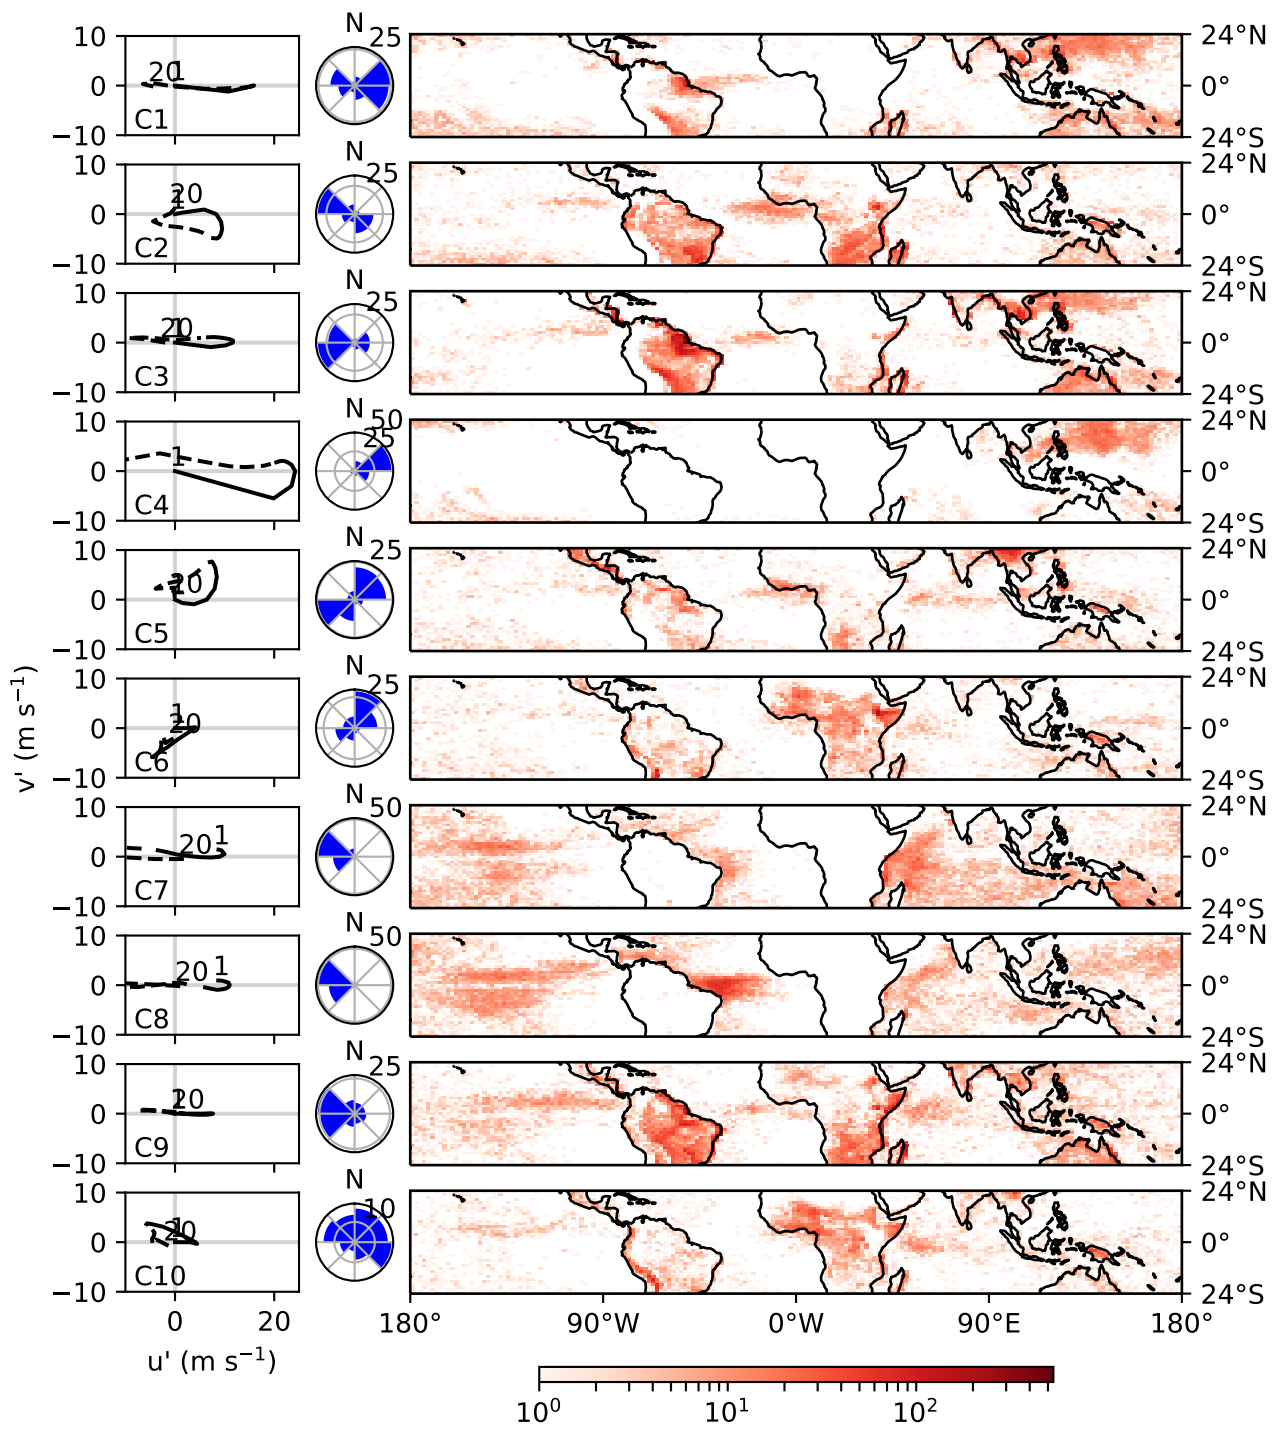

Figure S10. Seed 725154

## 5 Sensitivity to parameters

| prod | low CAPE | high CAPE | low shear | high shear | low fav. | high fav. |
|------|----------|-----------|-----------|------------|----------|-----------|
| C1   | 6        | 6         | 10        | 5          | 5        | 10        |
| C2   | 1        | 5         | 2         | 6          | 4        | 9         |
| C3   | 3        | 9         | 3         | 4          | 6        | 5         |
| C4   | 10       | 8         | 6         | 7          | 7        | 4         |
| C5   | 9        | 10        | 5         | 8          | 2        | 6         |
| C6   | 5        | 7         | 8         | 10         | 10       | 7         |
| C7   | 7        | 3         | 4         | 9          | 3        | 2         |
| C8   | 2        | 2         | 1         | 3          | 1        | 1         |
| C9   | 8        | 4         | 7         | 1          | 8        | 8         |
| C10  | 4        | 1         | 9         | 2          | 9        | 3         |

**Table 2.** RWPs, showing the match up between production and the various sensitivity tests

I ran six sensitivity tests:

1. low CAPE: CAPE less than  $75 \text{ J kg}^{-1}$
2. high CAPE: CAPE less than  $125 \text{ J kg}^{-1}$
3. low max. shear: max. shear less than 65th percentile
4. high max. shear: max. shear less than 85th percentile
5. low favour factor: favour factor = 3
6. high favour factor: favour factor = 5

The match up between production and each of the sensitivity tests was good. In all cases, there was a one-to-one correspondence between the 10 RWPs in production and the sensitivity tests (see Table 2). For “high CAPE”, the form of C6 was slightly different. “high CAPE” and “high shear” runs had noticeably fewer profiles included. “low favour factor” and “high favour factor” had respectively 8 and 6 PCs.

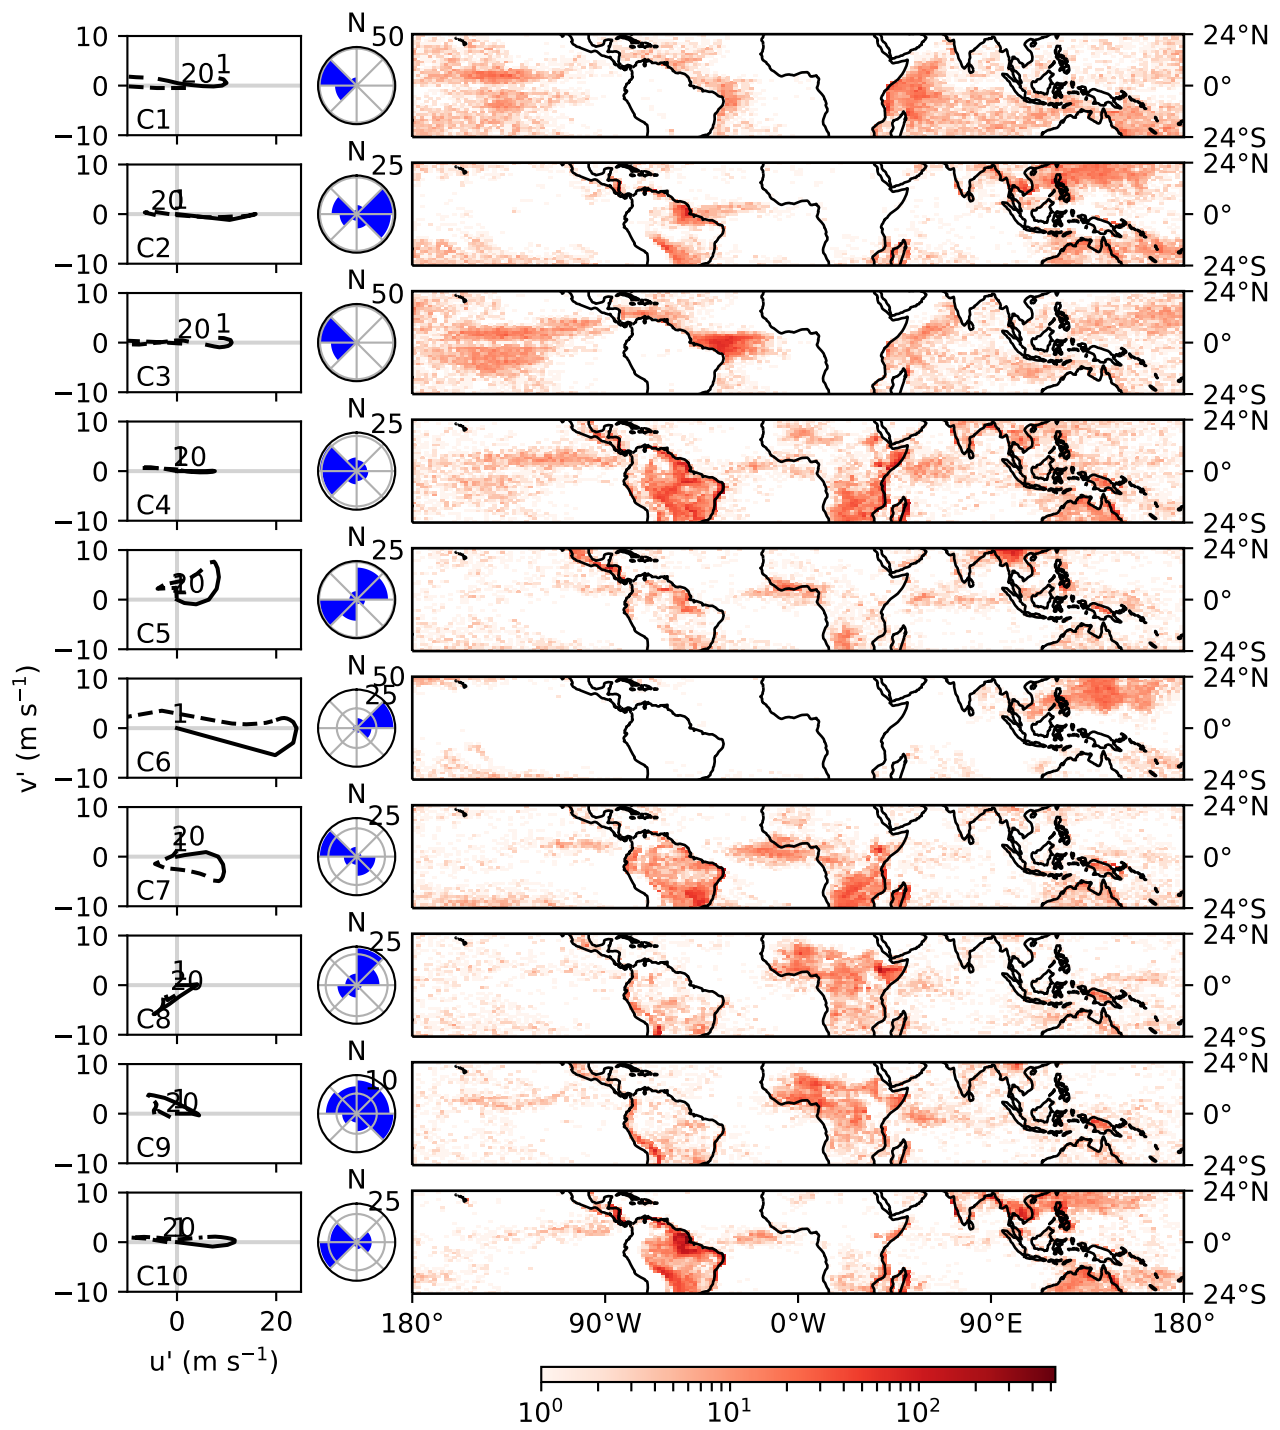

Figure S11. Low CAPE

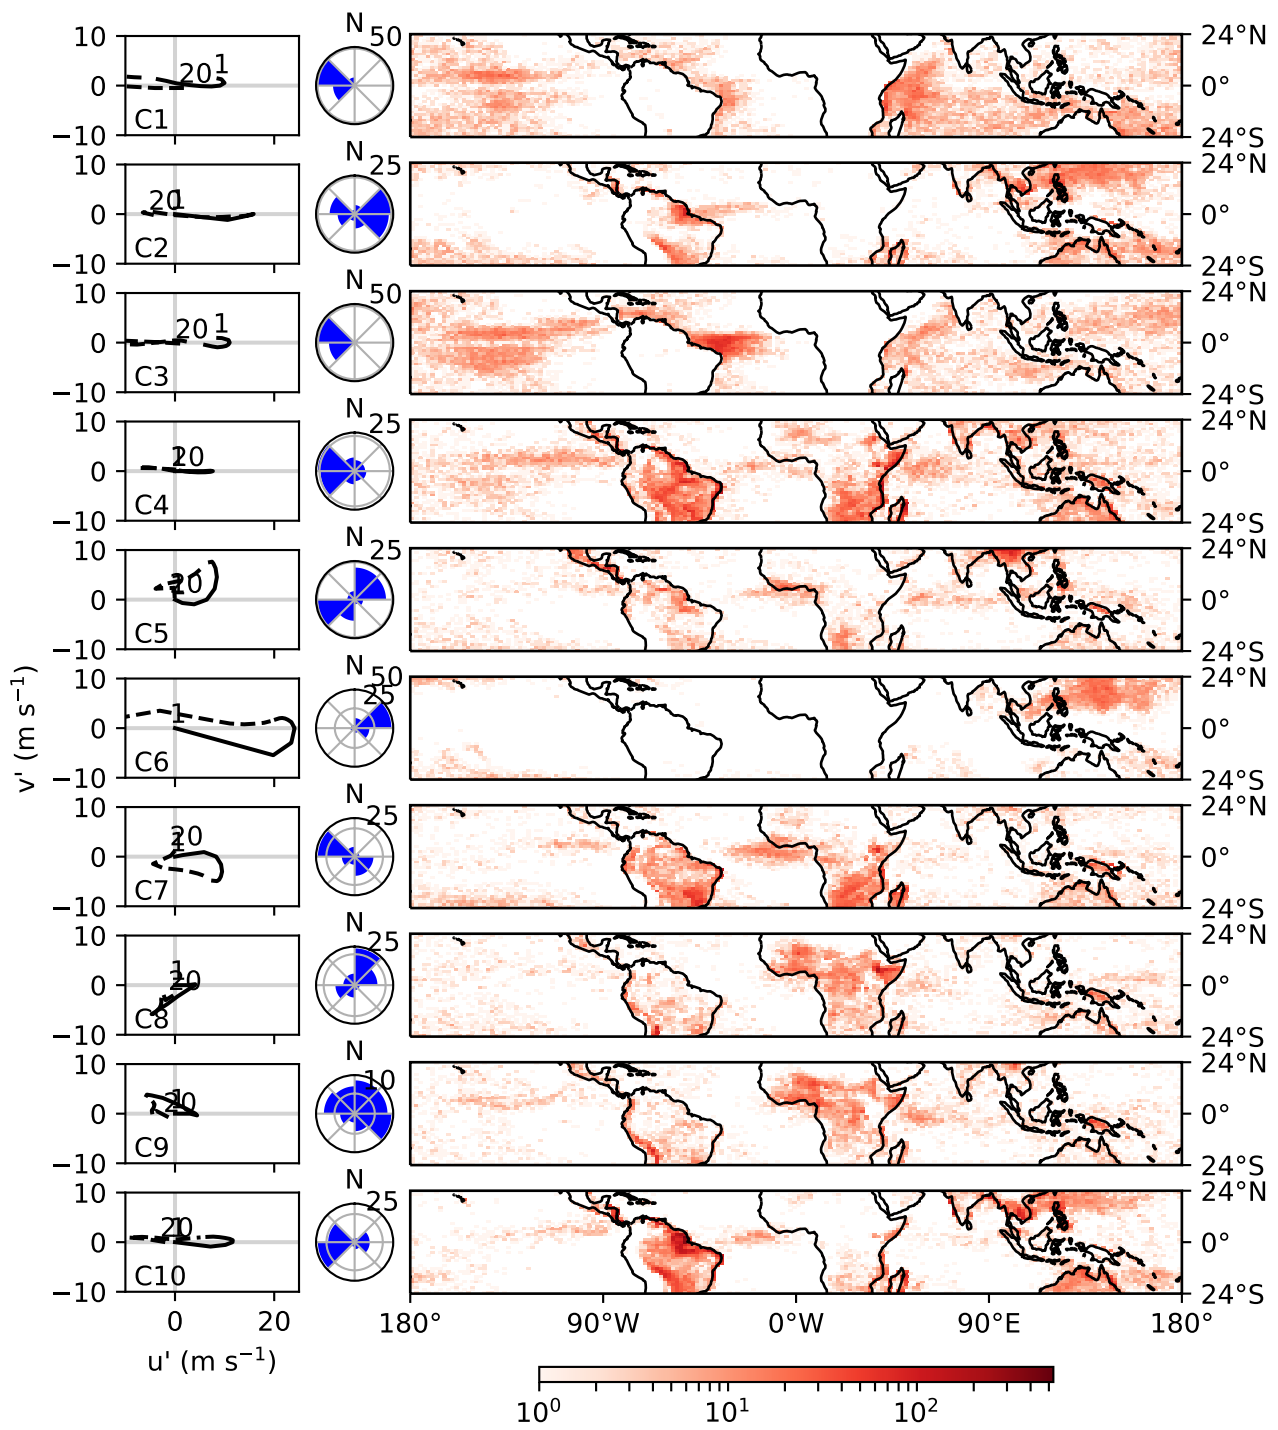

Figure S12. High CAPE



Figure S13. Low shear



Figure S14. High shear



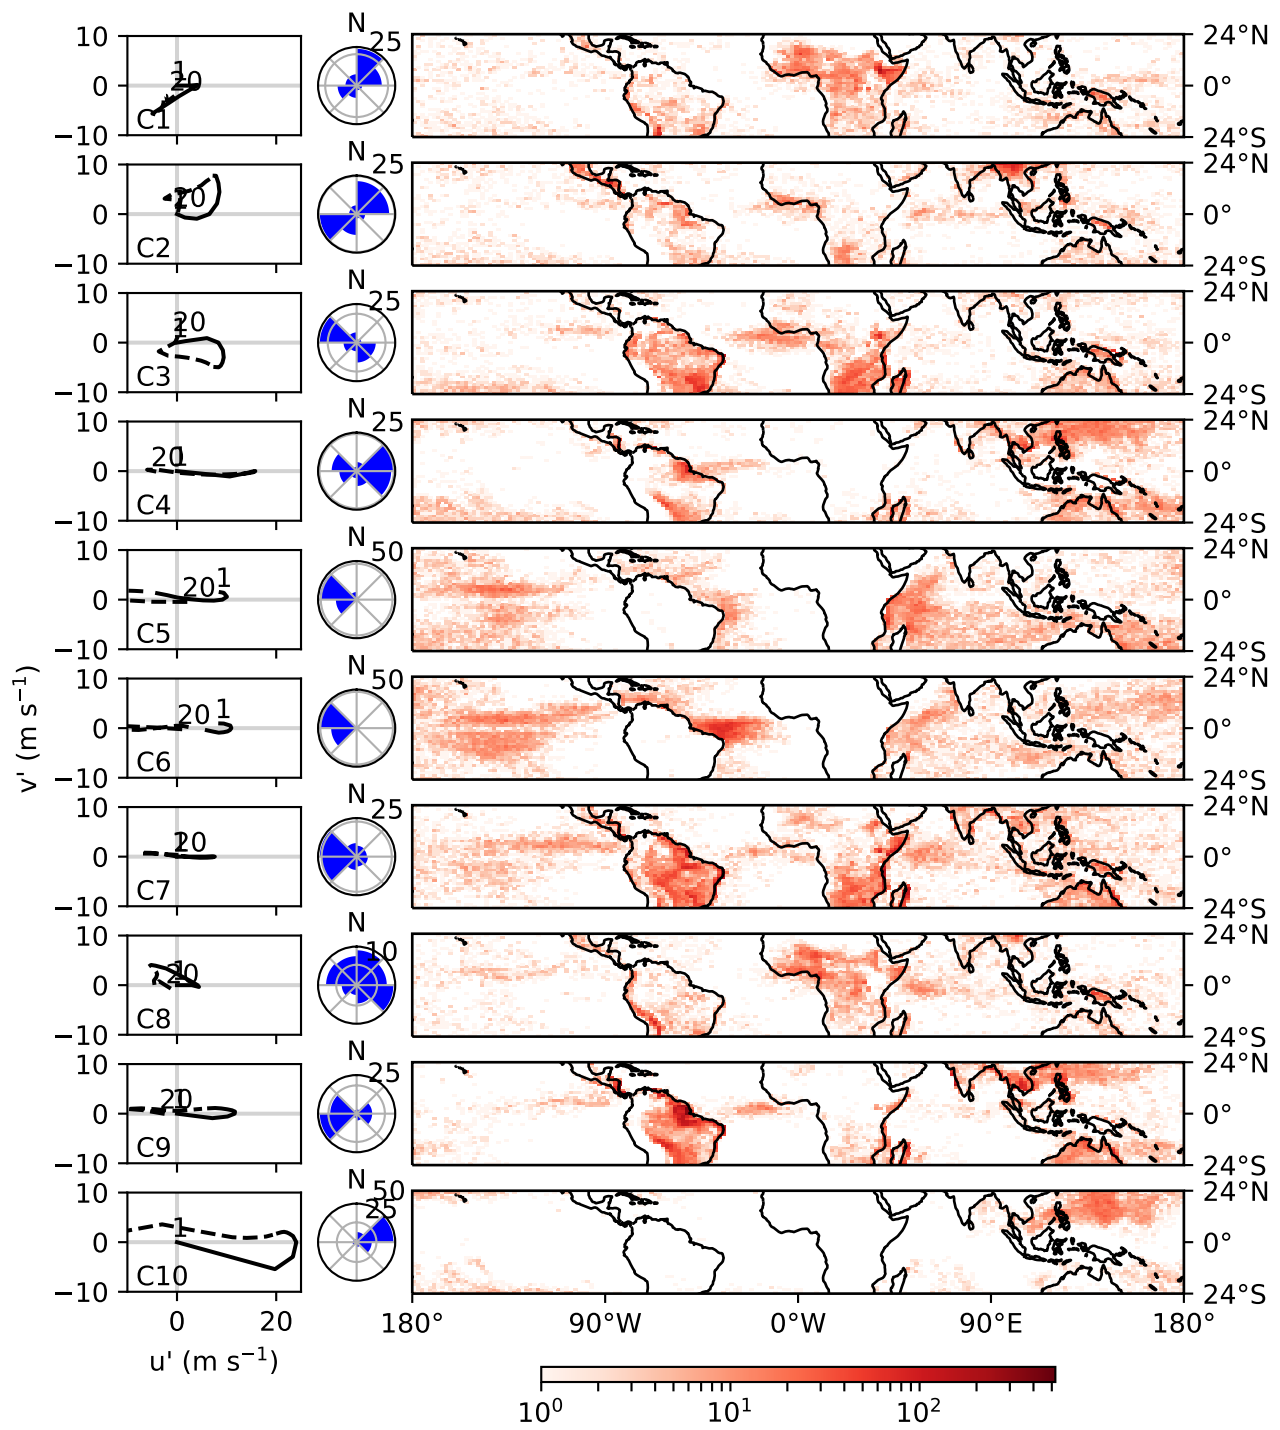

Figure S15. Low favour factor

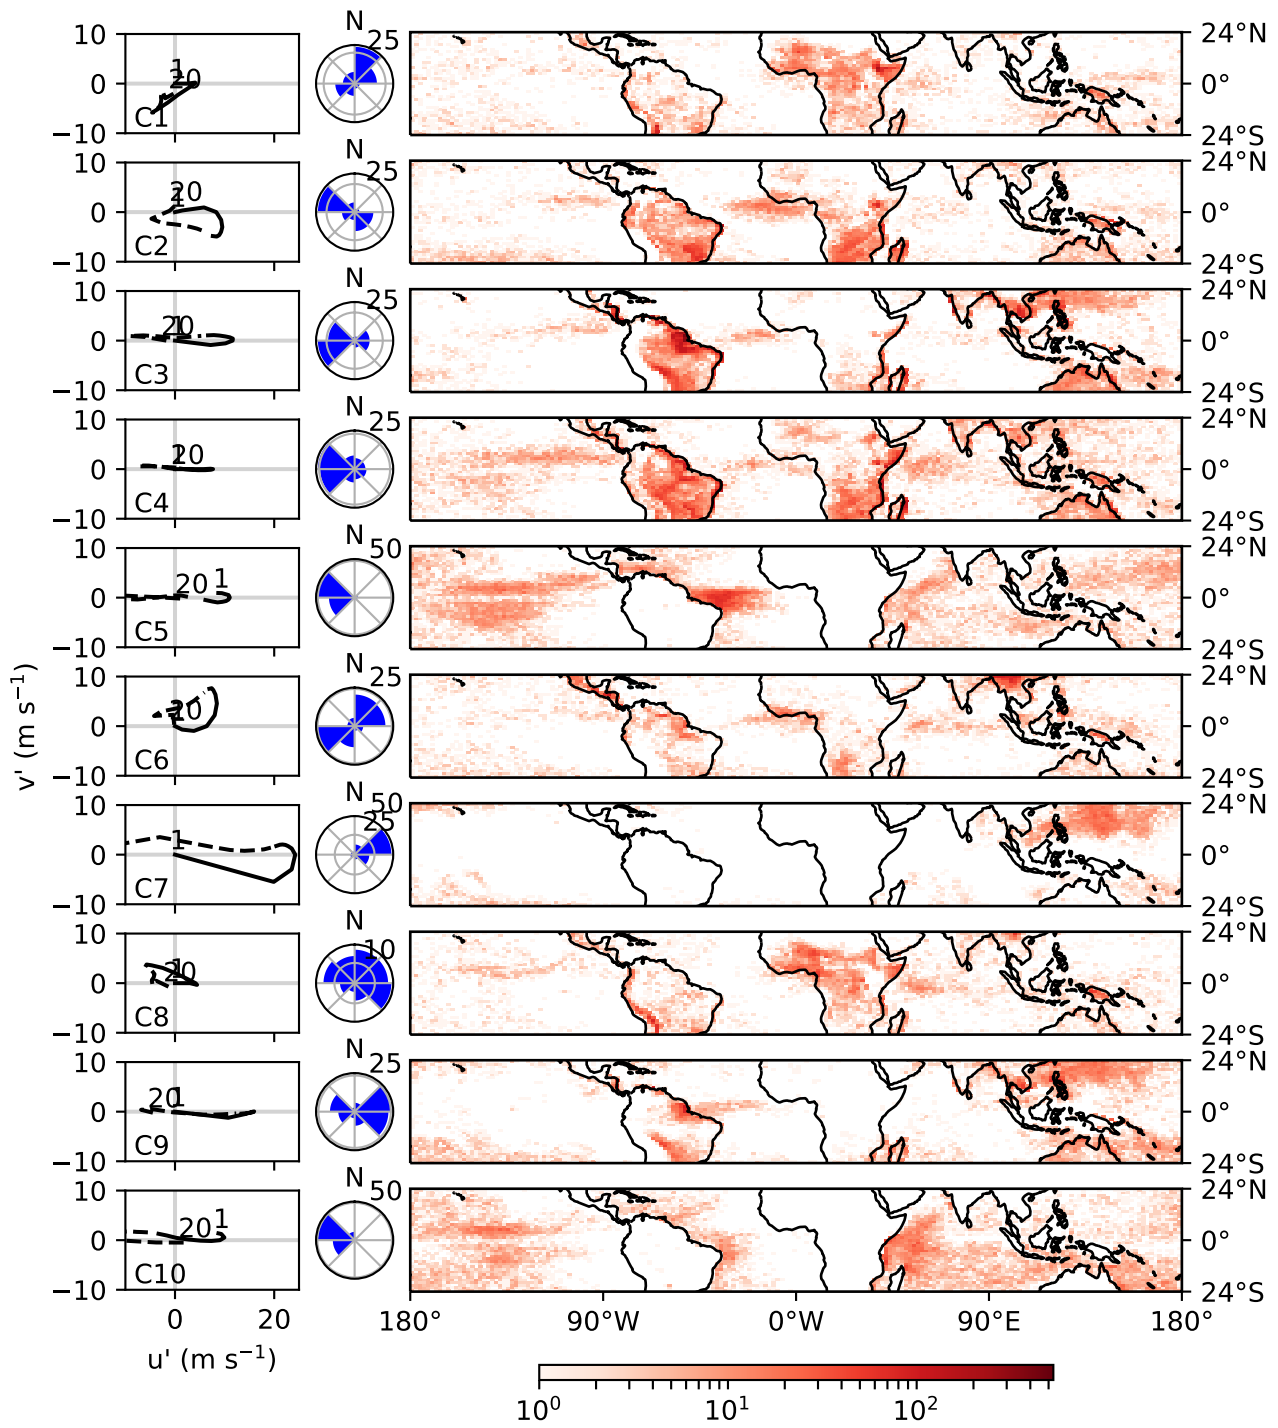

Figure S16. High favour factor

## 6 K-means elbow plot

There is no obvious 'kink' in the scores for different number of clusters.

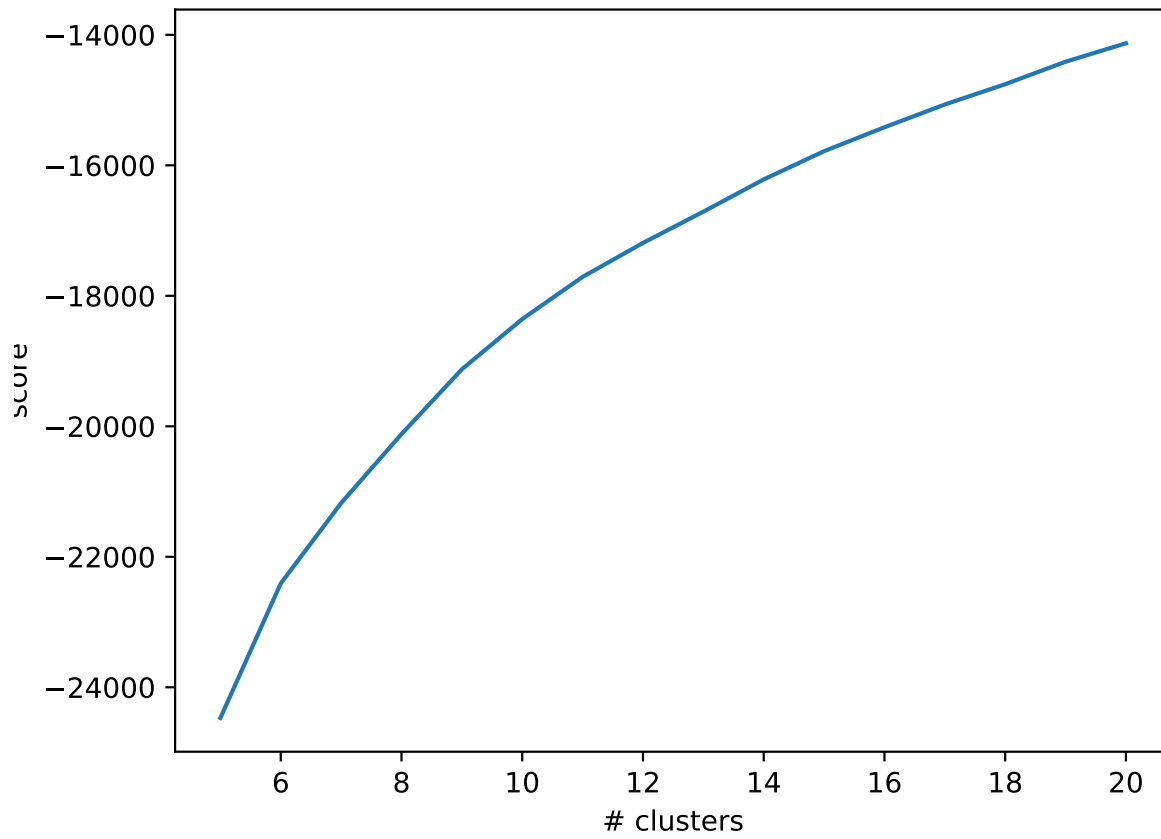

**Figure S17.** K-means scores
